# Supplementary material
Source: MDPI journal article supplement (https://www.mdpi.com/1424-2818/15/2/306)
Supplement: s1 [file s1]

### Supplementary material:

**Table S1:** Table of gekkonid species found in the Southern African countries, and the genetic sequences obtained from Genbank used in the phylogenetic tree production. All gecko species found in South Africa are listed in this table, and those species that did not have genetic information for the three gene regions are indicated (“no seq” or “NS”).

| Species                           | Common names              | IndivID         | ND2      | RAG1     | PDC      |
|-----------------------------------|---------------------------|-----------------|----------|----------|----------|
| <i>Afroedura amatolica</i>        | Amatola Flat Gecko        | PEM 1190        | KM073622 | KM073464 | KM073576 |
| <i>Afroedura broadleyi</i>        | Broadley's Flat Gecko     | LMH 92          | KM073627 | KM073467 | KM073603 |
| <i>Afroedura granitica</i>        | Lillie Flat Gecko         | MCZR 184411     | KM073630 | KM073471 | KM073580 |
| <i>Afroedura haackei</i>          | Haacke's Flat Gecko       | MBUR 00109      | KM073632 | KM073473 | KM073582 |
| <i>Afroedura halli</i>            | Hall's Flat Gecko         | MBUR 00429      | KM073634 | KM073475 | KM073583 |
| <i>Afroedura hawequensis</i>      | Hawequa Flat Gecko        | MH 0221         | KM073644 | KM073483 | KM073585 |
| <i>Afroedura karroica</i>         | Karoo Flat Gecko          | PEM-ZAF:1112    | JX041302 | JQ945277 | JQ945345 |
| <i>Afroedura langi</i>            | Lang's Flat Gecko         | AMB8199         | EU054231 | EU054207 | EU054183 |
| <i>Afroedura leoloensis</i>       | Sekhukhuneland Flat Gecko | (no seq)        |          |          |          |
| <i>Afroedura major</i>            | Swazi Flat Gecko          | RCBS 2130       | KM073647 | NS       | KM073590 |
| <i>Afroedura maripi</i>           | Mariepskop Flat Gecko     | MBUR 01525      | KM073648 | KM073488 | KM073591 |
| <i>Afroedura marleyi</i>          | Marley's Flat Gecko       | MBUR 01187      | KM073651 | KM073491 | KM073593 |
| <i>Afroedura multiporis</i>       | Woodbush Flat Gecko       | PEM R16805      | EU054232 | EU054208 | EU054184 |
| <i>Afroedura namaquensis</i>      | Namaqua Flat Gecko        | (no seq)        |          |          |          |
| <i>Afroedura nivaria</i>          | Drakensberg Flat Gecko    | TM 83237        | KM073659 | KM073497 | KM073598 |
| <i>Afroedura pienaari</i>         | Pienaar's Flat Gecko      | MCZR 184480     | KM073665 | KM073503 | KM073599 |
| <i>Afroedura pondolia</i>         | Pondo Flat Gecko          | JM 1036         | KM073668 | KM073506 | KM073600 |
| <i>Afroedura pongola</i>          | Pongola Flat Gecko        | PEMR 17585      | KM073669 | KM073507 | KM073601 |
| <i>Afroedura rondavelica</i>      | Blyde River Flat Gecko    | (no seq)        |          |          |          |
| <i>Afroedura rupestris</i>        | Abel Erasmus Flat Gecko   | (no seq)        |          |          |          |
| <i>Afroedura tembulica</i>        | Tembu Flat Gecko          | PEMR 16926      | KM073671 | KM073509 | KM073606 |
| <i>Afroedura transvaalica</i>     | Zimbabwe Flat Gecko       | NMZB 17703      | KM073683 | KM073516 | KM073607 |
| <i>Afroedura waterbergensis</i>   | Waterberg Flat Gecko      | MBUR 01548      | KM073684 | KM073520 | KM073609 |
| <i>Afrogecko porphyreus</i>       | Marbled Leaf-toed Gecko   | CAS 206995      | EF490776 | EF490723 | EF490697 |
| <i>Chondrodactylus angulifer</i>  | Giant Ground Gecko        | MCZ:R-184985    | KY224209 | KY224307 | KY224257 |
| <i>Chondrodactylus bibronii</i>   | Bibron's Gecko            | CAS:201841      | JN543886 | JN543930 | KY224258 |
| <i>Chondrodactylus laevigatus</i> | Fischer's Gecko           | MCZ R-184819    | KY224211 | KY224310 | KY224260 |
| <i>Chondrodactylus turneri</i>    | Turner's Gecko            | AMB 8187        | KM073688 | KM073525 | KM073612 |
| <i>Cryptactites peringueyi</i>    | Coastal Marsh Gecko       | CAS:HERP:186374 | JX041339 | JQ945300 | JQ945369 |
| <i>Goggia braacki</i>             | Braack's Pygmy Gecko      | AMB 4265        | KM073689 | KM073528 | KM073614 |
| <i>Goggia essexi</i>              | Essex's Pygmy Gecko       | LSUMZ:H1655     | MF154676 | MF154799 | MF154743 |

| Species                               | Common names                 | IndivID                                  | ND2      | RAG1     | PDC      |
|---------------------------------------|------------------------------|------------------------------------------|----------|----------|----------|
| <i>Goggia gemmula</i>                 | Richtersveld Pygmy Gecko     | AMB 5006                                 | MF154689 | MF154812 | MF154753 |
| <i>Goggia hewitti</i>                 | Hewitt's Pygmy Gecko         | JB 58                                    | MF154696 | MF154819 | MF154758 |
| <i>Goggia hexapora</i>                | Cederberg Pygmy Gecko        | MH1410                                   | MF154707 | MF154830 | MF154768 |
| <i>Goggia incognita</i>               | Southern Striped Pygmy Gecko | AMB 6805                                 | MF154710 | MF154833 | MF154771 |
| <i>Goggia lineata</i>                 | Northern Striped Pygmy Gecko | AMB4762                                  | JX041353 | JQ945310 | JQ945378 |
| <i>Goggia matzikamaensis</i>          | Kliprand Pygmy Gecko         | (no seq)                                 |          |          |          |
| <i>Goggia microlepidota</i>           | Small-scaled Pygmy Gecko     | JB 52                                    | MF154734 | MF154857 | MF154790 |
| <i>Goggia rupicola</i>                | Namaqua Pygmy Gecko          | MH 1404                                  | MF154739 | MF154862 | MF154794 |
| <i>Hemidactylus mabouia</i>           | Common Tropical House Gecko  | CAS 263375                               | MN843818 | MN853055 | MN843918 |
| <i>Homopholis arnoldi</i>             | Arnold's Velvet Gecko        | MCZR190441                               | KF982287 | KF982297 | KF982292 |
| <i>Homopholis mulleri</i>             | Muller's Velvet Gecko        | MCZF38772                                | EU054169 | EU054217 | EU054193 |
| <i>Homopholis wahlbergii</i>          | Wahlberg's Velvet Gecko      | AMB8123                                  | EU054248 | KM073532 | EU054200 |
| <i>Lygodactylus bradfieldi</i>        | Bradfield's Dwarf Gecko      | AMB7628                                  | JX041381 | HQ426301 | HQ426212 |
| <i>Lygodactylus capensis</i>          | Common Dwarf Gecko           | MCZR-192363                              | KM034122 | KM034173 | NS       |
| <i>Lygodactylus graniticulus</i>      | Granite Dwarf Gecko          | MCZR-192327                              | KM034125 | KM034176 | NS       |
| <i>Lygodactylus incognitus</i>        | Cryptic Dwarf Gecko          | CAS234211                                | KM034165 | KM034216 | MZ772244 |
| <i>Lygodactylus methueni</i>          | Methuen's Dwarf Gecko        | MBUR 01692                               | KM034138 | KM034189 | MZ772251 |
| <i>Lygodactylus montiscaeruli</i>     | Makgabeng Dwarf Gecko        | MBUR 00357                               | KM034145 | KM034196 | MZ772253 |
| <i>Lygodactylus nigropunctatus</i>    | Black-spotted Dwarf Gecko    | MCZR-184440                              | KM034151 | KM034202 | MZ772254 |
| <i>Lygodactylus ocellatus</i>         | Spotted Dwarf Gecko          | PEMR 16421                               | KM034153 | KM034204 | MZ772255 |
| <i>Lygodactylus soutpansbergensis</i> | Soutpansberg Dwarf Gecko     | MCZR 192365                              | MT874649 | KM034192 | MZ772260 |
| <i>Lygodactylus stevensoni</i>        | Stevenson's Dwarf Gecko      | AMB 8192 /<br>MCZR- 192298 /<br>AMB 8192 | MT874609 | KM034174 | MZ772265 |
| <i>Lygodactylus waterbergensis</i>    | Waterberg Dwarf Gecko        | CAS 234227                               | KM034166 | KM034217 | MZ772268 |
| <i>Pachydactylus affinis</i>          | Transvaal Gecko              | PEM R-17545                              | KY224216 | DQ275433 | KY224265 |
| <i>Pachydactylus amoenus</i>          | Kamaggas Gecko               | JB 117                                   | JN569138 | JN569169 | NS       |
| <i>Pachydactylus atorquatus</i>       | Augrabies Gecko              | MCZ R-184811                             | KY224218 | KY224317 | KY224266 |
| <i>Pachydactylus austeni</i>          | Austen's Gecko               | AMB3295                                  | JX041390 | JQ945321 | JQ945389 |
| <i>Pachydactylus barnardi</i>         | Barnard's Rough Gecko        | MCZ R-184749                             | KY224219 | KY224318 | KY224267 |
| <i>Pachydactylus capensis</i>         | Cape Gecko                   | MCZ R-184499                             | HQ165962 | HQ165992 | HQ165977 |
| <i>Pachydactylus carinatus</i>        | Richtersveld Gecko           | LSUMZ 57293                              | KY224221 | KY224319 | KY224272 |
| <i>Pachydactylus formosus</i>         | Southern Rough Gecko         | CAS 206715                               | KY224222 | KY224320 | KY224273 |

| Species                             | Common names              | IndivID                                | ND2      | RAG1     | PDC      |
|-------------------------------------|---------------------------|----------------------------------------|----------|----------|----------|
| <i>Pachydactylus geitje</i>         | Ocellated Gecko           | (no seq)                               |          |          |          |
| <i>Pachydactylus haackei</i>        | Haacke's Gecko            | CAS 186341                             | KY224225 | KY224323 | KY224277 |
| <i>Pachydactylus kladaroderma</i>   | Thin-skinned Gecko        | PEM<ZAF>:1253                          | KY224251 | JQ945323 | JQ945391 |
| <i>Pachydactylus labialis</i>       | Western Cape Gecko        | MCZ R-184758                           | KY224227 | KY224325 | KY224279 |
| <i>Pachydactylus latirostris</i>    | Quartz Gecko              | PEM R16720                             | JN569141 | JN569173 | KY224280 |
| <i>Pachydactylus macrolepis</i>     | Large-scales Banded Gecko | PEM R17668                             | JN569139 | JN569170 | KY224281 |
| <i>Pachydactylus maculatus</i>      | Spotted Gecko             | CAS 186380                             | KY224228 | KY224326 | KY224282 |
| <i>Pachydactylus mariquensis</i>    | Marico Gecko              | MB 21009                               | JN569157 | JN569190 | NS       |
| <i>Pachydactylus monicae</i>        | Monica's Gecko            | CAS 193418                             | HQ165952 | HQ165982 | HQ165967 |
| <i>Pachydactylus montanus</i>       | Namaqua Mountain Gecko    | MCZ R-184243                           | KY224229 | KY224327 | KY224284 |
| <i>Pachydactylus namaquensis</i>    | Namaqua Gecko             | MBUR01770 / JB247 / JB247              | KY224230 | KY224328 | KY224285 |
| <i>Pachydactylus oculatus</i>       | Golden Spotted Gecko      | PEM1284                                | KY224231 | KY224329 | KY224286 |
| <i>Pachydactylus punctatus</i>      | Speckled Gecko            | PEM R-12461                            | KY224233 | KY224331 | KY224291 |
| <i>Pachydactylus purcelli</i>       | Purcell's Gecko           | PEM FN1270                             | HQ165955 | HQ165985 | HQ165970 |
| <i>Pachydactylus rangei</i>         | Namib Web-footed Gecko    | MCZ:R-183725                           | JX041394 | JQ945324 | JQ945392 |
| <i>Pachydactylus rugosus</i>        | Common Rough Gecko        | CAS:HERP:201905                        | JX041395 | JQ945325 | JQ945393 |
| <i>Pachydactylus tigrinus</i>       | Tiger Gecko               | NMB R10936                             | KY224237 | KY224336 | KY224297 |
| <i>Pachydactylus vansonii</i>       | Van Son's Gecko           | MCZR-184434 / CAS 195392 / MCZR-184434 | KY224239 | DQ275432 | KY224299 |
| <i>Pachydactylus visseri</i>        | Visser's Gecko            | JB 59                                  | KY224240 | KY224338 | KY224300 |
| <i>Pachydactylus wahlbergii</i>     | Kalahari Ground Gecko     | NMZB:16974                             | JX041337 | JQ945298 | JQ945366 |
| <i>Pachydactylus weberi</i>         | Weber's Gecko             | PEM R12449                             | HQ165960 | HQ165990 | HQ165975 |
| <i>Ptenopus garrulus</i>            | Common Barking Gecko      | Pgar1                                  | HQ165960 | NS       | NS       |
| <i>Ramigekko swartbergensis</i>     | Swartberg Leaf-toed Gecko | JB47                                   | JX041305 | JQ945280 | JQ945348 |
| <i>Rhoptropella ocellata</i>        | Namaqua Day Gecko         | AMB3860                                | NS       | HQ426308 | HQ426219 |
| <b>OUTGROUPS</b>                    |                           |                                        |          |          |          |
| <i>Phyllodactylus tuberculosus</i>  |                           | KU 289758                              | JX041411 | EU293630 | EU293698 |
| <i>Phyllodactylus delcampoi</i>     |                           | JAC21928                               | JX041407 | HQ426310 | HQ426221 |
| <i>Phyllodactylus bugastrolepis</i> |                           | ROM 38489                              | JX041406 | EU293631 | EU293699 |
| <i>Phyllodactylus bordai</i>        |                           | AMCC118242                             | JX041405 | HQ426309 | HQ426220 |
