# Supplementary material
Source: MDPI journal article supplement (https://www.mdpi.com/1424-2818/15/2/306)
Supplement: s1 [file s1]

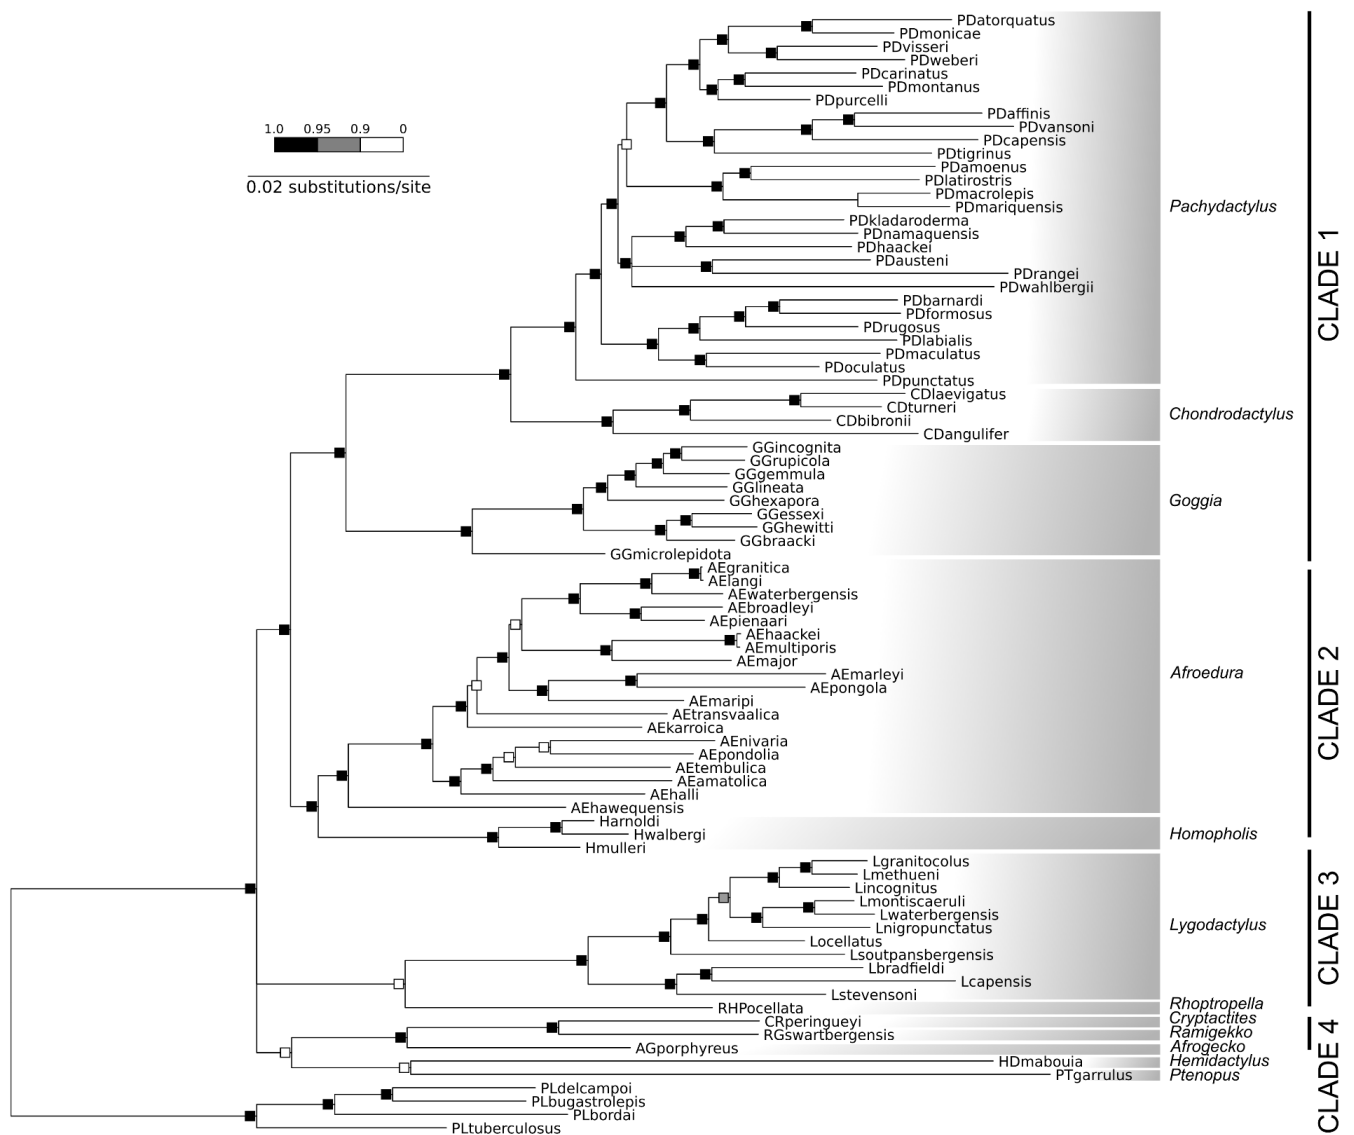

**Figure S1:** Phylogeny of the gekkonid species that occur in the South African countries, estimated using Bayesian Inference. Squares shown indicate the posterior probability at the node, colour coded as in the scale inset top-left.
