# Supplementary material
Source: MDPI journal article supplement (https://www.mdpi.com/1424-2818/15/2/306)
Supplement: s1 [file s1]

Archive with 2 entries (2 files):
- Gekkonid Diversity_Supp mat_FigS1.pdf
- Gekkonid Diversity_Supp mat_TableS1.pdf
